# Supplementary material for: Prognostic factors for survival after allogeneic transplantation in acute lymphoblastic leukemia
Source: PubMed Central journal article supplement (PMC8266681; doi:10.1038/s41409-020-01101-z), 2020-10-31
Supplement: 41409_2020_1101_MOESM1_ESM.pdf [file 41409_2020_1101_MOESM1_ESM.pdf]

**Supplementary table 1. Additional information on patients' characteristics and transplantation procedure (n = 180).**

|                                                           |                                                                                                                                     |                                                |
|-----------------------------------------------------------|-------------------------------------------------------------------------------------------------------------------------------------|------------------------------------------------|
| <b>Body weight (range)</b>                                | [kg]                                                                                                                                | 73 (47 - 130)                                  |
| <b>Phenotype (%)</b>                                      | proB- / C- / preB- / mature B-ALL                                                                                                   | 16 / 83 / 23 / 9 (9 / 46 / 13 / 5)             |
|                                                           | early / thymic / mature T-ALL                                                                                                       | 23 / 13 / 8 (13 / 7 / 4)                       |
|                                                           | biphenotypic ALL                                                                                                                    | 5 (3)                                          |
|                                                           | tALL                                                                                                                                | 6 (3)                                          |
| <b>Therapy prior to allo-SCT (%)</b>                      | initial treatment in prospective GMALL trial yes / no                                                                               | 42 / 138 (23 / 77)                             |
|                                                           | <b>auto-SCT</b> yes / no                                                                                                            | 2 / 178 (1 / 99)                               |
|                                                           | <b>TKI</b> yes / no                                                                                                                 | 29 / 21 (58 / 42) <sup>1</sup>                 |
|                                                           | <b>rituximab</b> yes / no                                                                                                           | 118 / 62 (66 / 34)                             |
|                                                           | <b>WBI</b> yes / no                                                                                                                 | 86 / 94 (48 / 52)                              |
|                                                           | <b>mediastinal irradiation</b> yes / no                                                                                             | 8 / 172 (4 / 96)                               |
|                                                           | <b>Salvage therapy in case of relapse (%)</b>                                                                                       | re-induction                                   |
|                                                           | high-dose cytosine arabinoside +/- mitoxantrone                                                                                     | 31 (49) <sup>2</sup>                           |
|                                                           | TKI                                                                                                                                 | 4 (6) <sup>2</sup>                             |
|                                                           | radiation in case of extramedullary recurrence                                                                                      | 4 (6) <sup>2</sup>                             |
|                                                           | blinatumomab                                                                                                                        | 2 (3) <sup>2</sup>                             |
|                                                           | no / not known                                                                                                                      | 3 (5) <sup>2</sup>                             |
| <b>Time between ID and allo-SCT (range) [months]</b>      |                                                                                                                                     | 6.2 (2.0 - 87.7)                               |
| <b>Time between relapse and allo-SCT (range) [months]</b> |                                                                                                                                     | 3.6 (0.9 - 30.4)                               |
| <b>Myeloablative conditioning regimen (%)</b>             | TBI                                                                                                                                 | 47 / 2 / 67 / 3 (39 / 2 / 56 / 3) <sup>3</sup> |
|                                                           | + etoposide 50mg/kg / + cyclophosphamide 60mg/kg / + both / + other                                                                 |                                                |
|                                                           | fludarabine 3x30 [25] mg/m <sup>2</sup> + thiotepa 3 [2] x5mg/kg + carmustin 300mg/m <sup>2</sup> / treosulfan 3x10g/m <sup>2</sup> | 34 [1] / 1 (56 [2] / 1) <sup>4</sup>           |
|                                                           | busulfan only 4x3.2mg/kg / + cyclophosphamide 2x60mg/kg / + fludarabine 4x30mg/m <sup>2</sup>                                       | 1 / 9 / 1 (1 / 15 / 1) <sup>4</sup>            |
|                                                           | [toxicity-reduced] fludarabine 4x30mg/m <sup>2</sup> + thiotepa 2x5mg/m <sup>2</sup> / + melphalan 140 [110] mg/m <sup>2</sup>      | 4 / 7 [3] (7 / 12 [5]) <sup>4</sup>            |
|                                                           | fludarabine 4x30mg/m <sup>2</sup> + carmustine 2x150mg/m <sup>2</sup> + melphalan 140 [110] mg/m <sup>2</sup>                       | 4 [2] (7 [3]) <sup>4</sup>                     |
| <b>Donor sex (%)</b>                                      | male / female                                                                                                                       | 106 / 74 (59 / 41)                             |
| <b>CMV-status (%)</b>                                     | donor pos / neg                                                                                                                     | 77 / 103 (43 / 57)                             |
|                                                           | patient pos / neg                                                                                                                   | 99 / 81 (55 / 45)                              |
| <b>Median engraftment (range)</b>                         | ANC > 500/nl                                                                                                                        | 17 (9 - 32)                                    |
|                                                           | [day after allo-SCT] PLT > 20/nl                                                                                                    | 13 (7 - 150)                                   |
| <b>DLI (%)</b>                                            | yes / no                                                                                                                            | 38 / 142 (21 / 79)                             |
| <b>Time between allo-SCT and DLI (range) [months]</b>     |                                                                                                                                     | 7.3 (1.0 - 102.4)                              |
| <b>Subsequent allo-SCT (%)</b>                            | yes / no                                                                                                                            | 23 / 157 (13 / 87)                             |

**Abbreviations:** ALL = acute lymphoblastic leukemia; t = therapy-related; GMALL = German ALL study group; auto-SCT = autologous stem cell transplantation; TKI = tyrosine kinase inhibitor; WBI = whole-brain irradiation; ID = initial diagnosis; allo-SCT = allogeneic stem cell transplantation; TBI = total body irradiation; pos = positive; neg = negative; CMV = cytomegalovirus, ANC = absolute neutrophil count; PLT = platelet count; DLI = donor lymphocyte infusion.

<sup>1</sup> as proportion of 50 patients with B-ALL Ph pos; <sup>2</sup> as proportion of 64 relapses; <sup>3</sup> as proportion of 119 patients with TBI; <sup>4</sup> as proportion of 61 patients without TBI.

**Supplementary table 2. Patients' characteristics with regard to the timepoint of allo-SCT.**

|                                            | <b>1995 - 2000</b><br>n = 55                     | <b>2001 - 2010</b><br>n = 82 | <b>2011 - 2018</b><br>n = 43 |                 |
|--------------------------------------------|--------------------------------------------------|------------------------------|------------------------------|-----------------|
| <b>Median age (range) [years]</b>          | 33 (16 - 57)                                     | 45 ( 19 - 69)                | 35 (18 - 79)                 |                 |
| <b>Phenotype (%)</b>                       | B-ALL Ph neg                                     | 26 (47)                      | 39 (49)                      | 21 (49)         |
|                                            | B-ALL Ph pos                                     | 15 (27)                      | 25 (29)                      | 10 (23)         |
|                                            | T-ALL                                            | 14 (26)                      | 18 (22)                      | 12 (28)         |
| <b>Remission state at allo-SCT (%)</b>     | CR1 MRD neg PCR <sup>1</sup> / FACS <sup>2</sup> | 7 / 8 (13 / 14)              | 16 / 21 (19 / 26)            | 16 / 1 (37 / 2) |
|                                            | CR1 MRD pos <sup>1+2</sup>                       | 6 (11)                       | 13 (16)                      | 14 (32)         |
|                                            | primary refractory                               | 3 (5)                        | 8 (10)                       | 3 (7)           |
|                                            | CR2 MRD neg PCR <sup>1</sup> / FACS <sup>2</sup> | 0 / 7 (0 / 13)               | 1 / 5 (1 / 6)                | 3 / 2 (7 / 4)   |
|                                            | CR2 MRD pos <sup>1+2</sup>                       | 2 (4)                        | 3 (4)                        | 0 (0)           |
|                                            | relapsed refractory                              | 22 (40)                      | 15 (18)                      | 4 (9)           |
| <b>Donor (%) related / unrelated</b>       | 28 / 27 (51 / 49)                                | 24 / 58 (29 / 71)            | 7 / 36 (16 / 84)             |                 |
| <b>Stem cell source (%) BM / PB</b>        | 23 / 32 (42 / 58)                                | 3 / 79 (4 / 96)              | 1 / 42 (2 / 98)              |                 |
| <b>TBI-based conditioning (%) yes / no</b> | 43 / 12 (78 / 22)                                | 50 / 32 (61 / 39)            | 24 / 19 (56 / 44)            |                 |
| <b>GvHD prophylaxis (%)</b>                | CyA                                              | 54 (98)                      | 81 (99)                      | 43 (100)        |
|                                            | + ATG                                            | 23 (42)                      | 23 (28)                      | 34 (79)         |
|                                            | + Alemtuzumab                                    | 0 (0)                        | 41 (50)                      | 6 (14)          |

**Abbreviations:** allo-SCT = allogeneic stem cell transplantation; ALL = acute lymphoblastic leukemia; Ph = Philadelphia chromosome; pos = positive; neg = negative; CR = complete remission; MRD = minimal residual disease; TBI = total body irradiation; BM = bone marrow; PB = peripheral blood; GvHD = graft-versus-host disease; CyA = cyclosporin A; ATG = Anti-thymocyte globulin.

<sup>1</sup> analysis of Ig-/TR-gene rearrangements via rtPCR in 11 (20%), 35 (43%) and 39 (91%) patients, respectively;

<sup>2</sup> analysis via surface marker analysis by flow cytometry in 44 (80%), 47 (57%) and 4 (9%) patients, respectively.

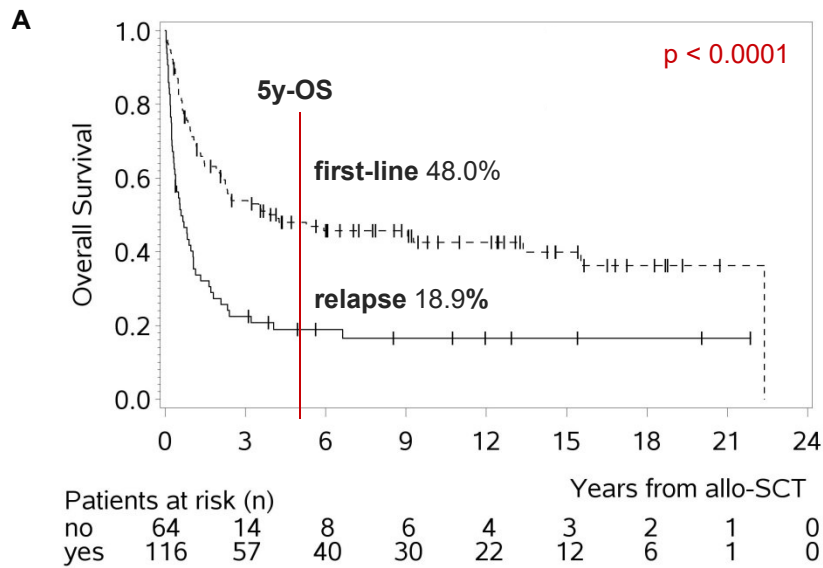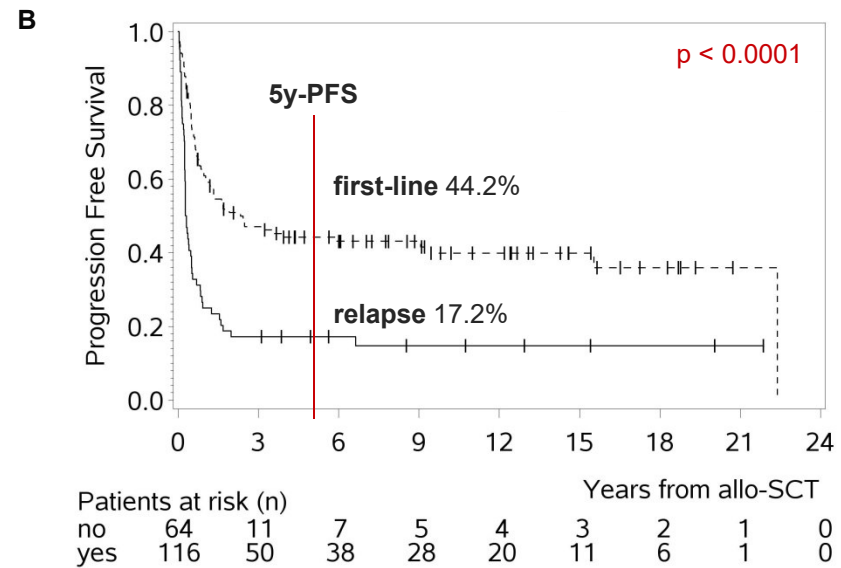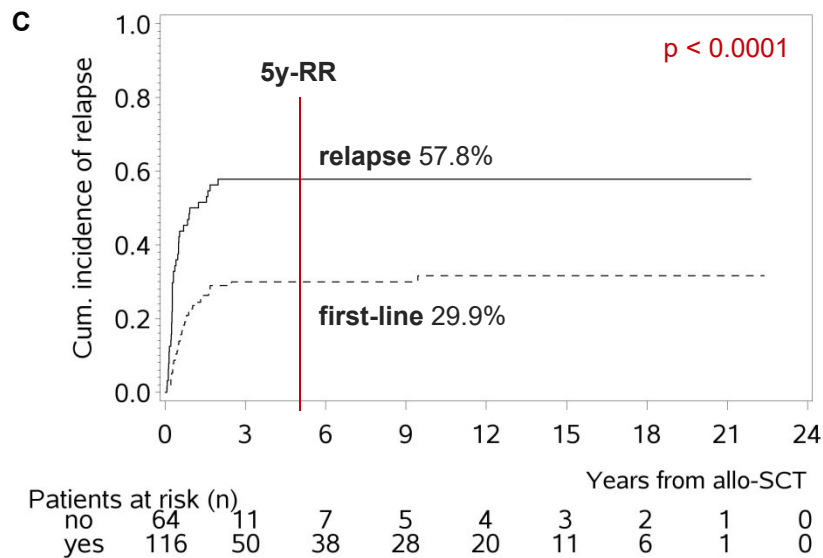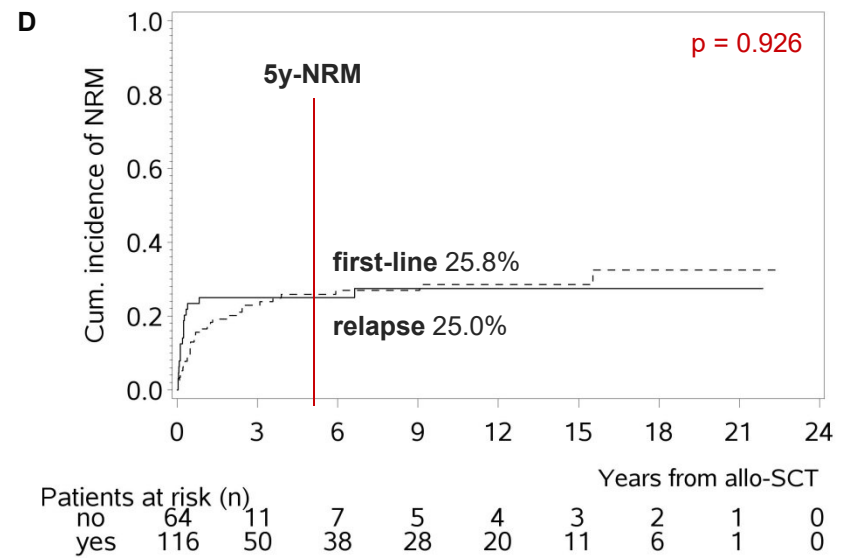

**Supplementary figure 1.** Impact of therapy line on outcome: Patients who received allo-SCT upfront in the course of their first-line therapy (1. CR and primary refractory;  $n = 116$ ) vs. those transplanted in case of relapsed disease (2. CR and relapsed refractory;  $n = 64$ ). **(A)** Kaplan-Meier estimates for OS, **(B)** Kaplan-Meier estimates for PFS, **(C)** cumulative incidence of relapse, **(D)** cumulative incidence of NRM.

**Abbreviations:** allo-SCT = allogeneic transplantation; OS = overall survival; PFS = progression free survival; RR = relapse rate; NRM = non-relapse-related mortality; y = year; CR = complete remission.

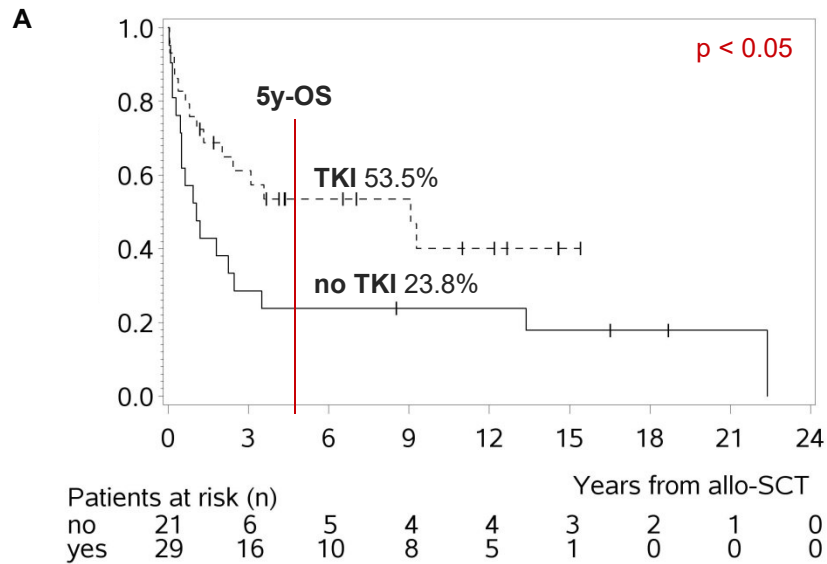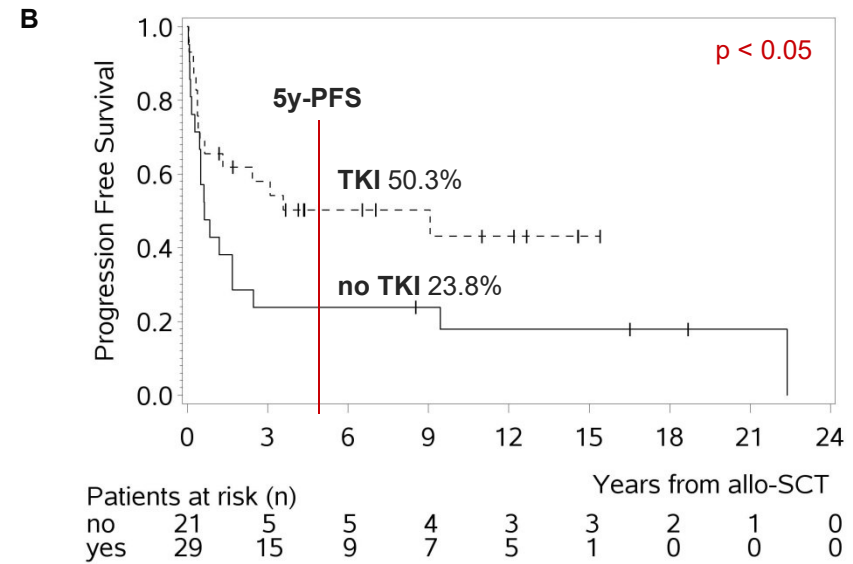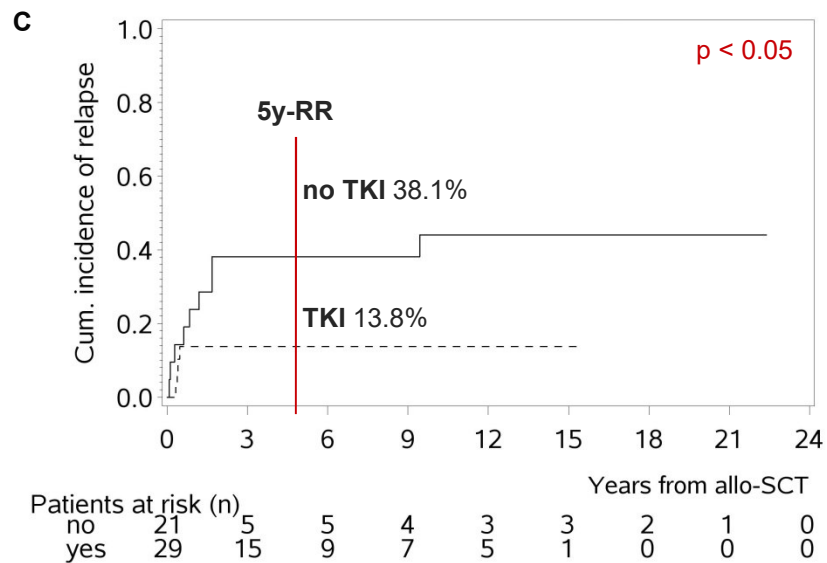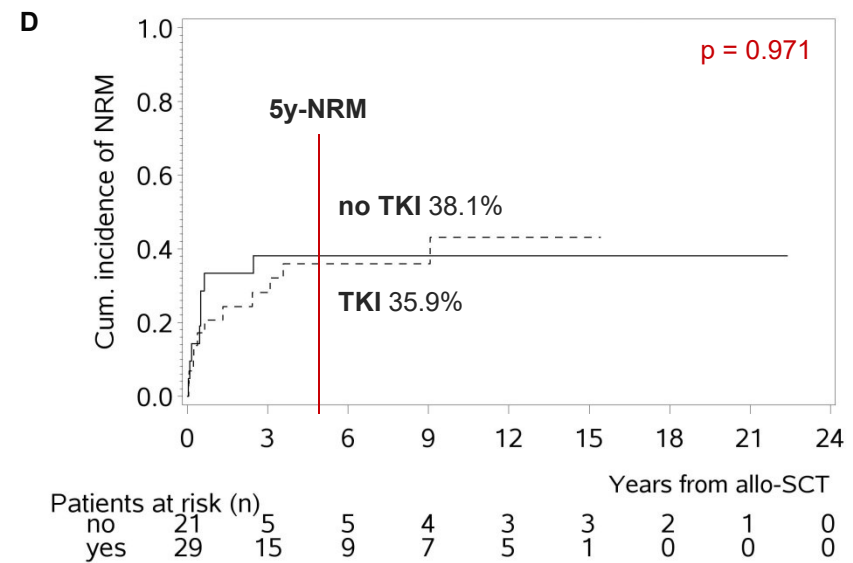

**Supplementary figure 2.** Differentiation of patients diagnosed with Philadelphia-positive B-ALL ( $n = 50$ ) treated in the pre-TKI era ( $n = 21$ ) vs. those who received additional therapy with TKI before allo-SCT ( $n = 29$ ). **(A)** Kaplan-Meier estimates for OS, **(B)** Kaplan-Meier estimates for PFS, **(C)** cumulative incidence of relapse, **(D)** cumulative incidence of NRM.

**Abbreviations:** OS = overall survival; PFS = progression free survival; RR = relapse rate; NRM = non-relapse-related mortality; y = year; ALL = acute lymphoblastic leukemia; allo-SCT = allogeneic transplantation; TKI = tyrosine kinase inhibitor.

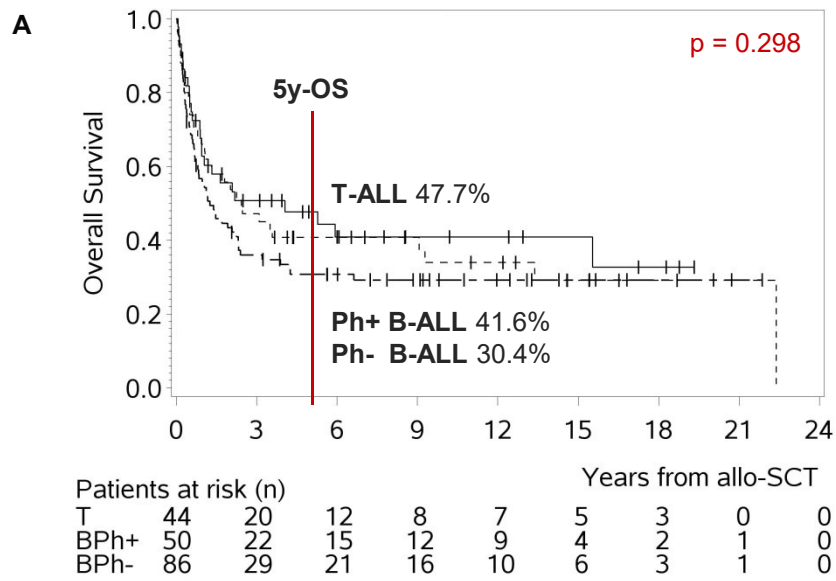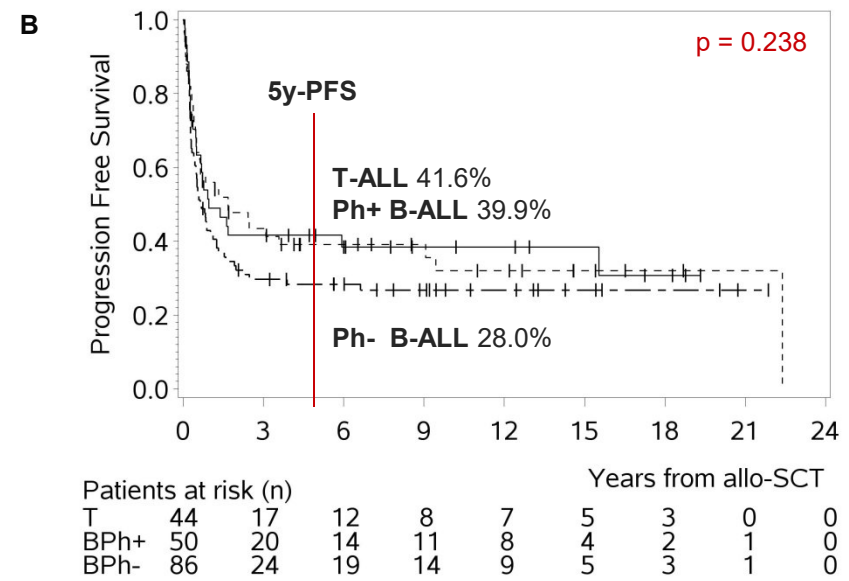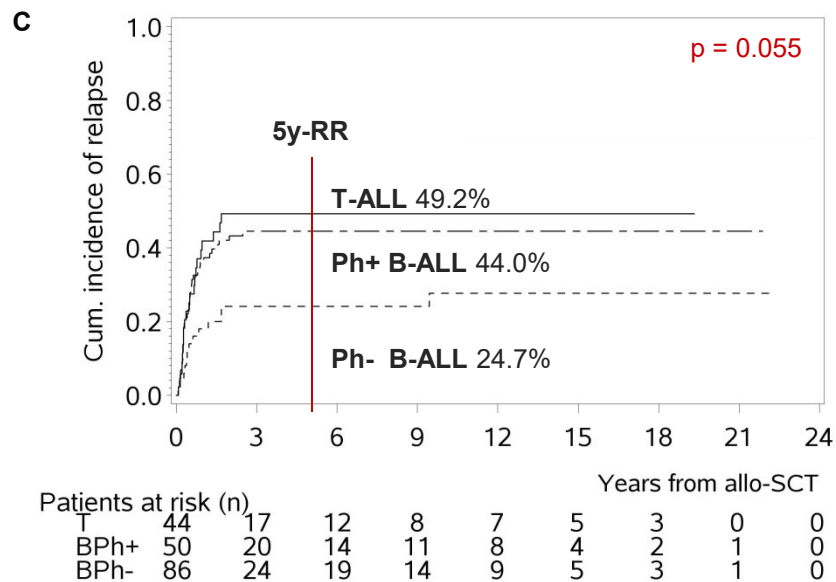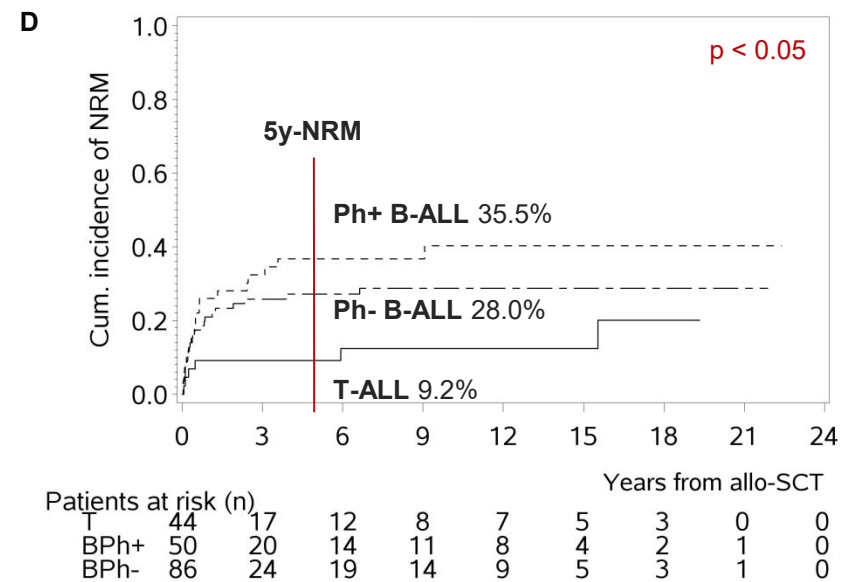

**Supplementary figure 3.** Impact of phenotype on outcome: Patients diagnosed with T-ALL (n = 44) vs. Philadelphia-positive B-ALL (n = 50) vs. Philadelphia-negative B-ALL (n = 86). **(A)** Kaplan-Meier estimates for OS, **(B)** Kaplan-Meier estimates for PFS, **(C)** cumulative incidence of relapse, **(D)** cumulative incidence of NRM.

**Abbreviations:** OS = overall survival; PFS = progression free survival; RR = relapse rate; NRM = non-relapse-related mortality; y = year; ALL = acute lymphoblastic leukemia; Ph = Philadelphia chromosome.
